# Supplementary material for: Cold Atmospheric-Pressure Plasma Caused Protein Damage in Methicillin-Resistant Staphylococcus aureus Cells in Biofilms
Source: MDPI journal article supplement (doi:10.3390/microorganisms9051072), 2021-05-17

## Supplementary Information

### Supplementary Table

**Supplementary Table 1.** Tryptic fragments of plasma-treated and untreated SaClpP protein identified by mass spectrometry. The modification fragments in plasma-treated SaClpP protein were indicated in blue.

| Amino acid residue No.       | Calculated mass (Da) | Measured mass (Da) | Sequences of identified peptides               | Spectrum count |
|------------------------------|----------------------|--------------------|------------------------------------------------|----------------|
| <b>Plasma-treated SaClpP</b> |                      |                    |                                                |                |
| 1–13                         | 1500.79              | 1500.80            | MNLIPTVIETTNR                                  | 62             |
| 1–13                         | 1516.80              | 1516.79            | M(O)NLIPTVIETTNR                               | 31             |
| 1–16                         | 1842.97              | 1842.96            | MNLIPTVIETTNRGER                               | 14             |
| 1–16                         | 1858.96              | 1858.96            | M(O)NLIPTVIETTNRGER                            | 8              |
| 2–13                         | 1369.76              | 1369.76            | NLIPTVIETTNR                                   | 10             |
| 2–16                         | 1711.93              | 1711.92            | NLIPTVIETTNRGER                                | 1              |
| 17–23                        | 886.42               | 886.42             | AYDIYSR                                        | 14             |
| <b>17–23</b>                 | <b>902.42</b>        | <b>902.42</b>      | <b>AYDIY(O)SR</b>                              | <b>3</b>       |
| 112–145                      | 3636.92              | 3636.92            | FALPNAEVMIHQPLGGAQQGQATEIEIAANHILK             | 3              |
| <b>112–145</b>               | <b>3651.92</b>       | <b>3651.91</b>     | <b>FALPNAEVMIHQPLGGAQ(O)GQATEIEIAANHILK</b>    | <b>1</b>       |
| <b>112–145</b>               | <b>3652.92</b>       | <b>3652.91</b>     | <b>FALPNAEVMIHQPLGGAQ(O)GQATEIEIAANHILK</b>    | <b>1</b>       |
| 113–145                      | 3480.83              | 3480.82            | FALPNAEVMIHQPLGGAQQGQATEIEIAANHILK             | 9              |
| 113–145                      | 3496.82              | 3496.81            | FALPNAEVMIHQPLGGAQ(O)GQATEIEIAANHILK           | 5              |
| <b>113–145</b>               | <b>3512.81</b>       | <b>3512.81</b>     | <b>FALPNAEVMIHQPLGGA(OO)QGQATEIEIAANHILK</b>   | <b>1</b>       |
| 113–147                      | 3737.98              | 3737.97            | FALPNAEVMIHQPLGGAQQGQATEIEIAANHILKTR           | 1              |
| <b>113–147</b>               | <b>3753.97</b>       | <b>3753.96</b>     | <b>FALPNAEVMIH(O)QPLGGAQQGQATEIEIAANHILKTR</b> | <b>1</b>       |
| 158–164                      | 761.39               | 761.39             | TGQSIEK                                        | 2              |
| 165–181                      | 1992.98              | 1992.98            | IQKDTDRDNFLTAEAAK                              | 14             |
| 168–181                      | 1623.74              | 1623.74            | DTDRDNFLTAEAAK                                 | 69             |
| <b>168–181</b>               | <b>1639.74</b>       | <b>1639.73</b>     | <b>DTDRDNF(O)LTAEAAK</b>                       | <b>10</b>      |
| <b>168–181</b>               | <b>1654.71</b>       | <b>1654.72</b>     | <b>DTDRDNFLTAEAAK(OO)</b>                      | <b>1</b>       |
| 168–195                      | 3227.53              | 3227.52            | DTDRDNFLTAEAAKEYGLIDEVMVPETK                   | 19             |
| 168–195                      | 3272.51              | 3272.48            | DTDRDNFLTAEAAKEYGLIDEVMVPETK(3-O)              | 2              |
| <b>168–195</b>               | <b>3243.52</b>       | <b>3243.51</b>     | <b>DTDRDNFLTAEAAKEY(O)GLIDEVMVPETK</b>         | <b>24</b>      |
| <b>168–195</b>               | <b>3259.52</b>       | <b>3259.51</b>     | <b>DTDRDNFLTAEAAKEYGLIDEVM(OO)VPETK</b>        | <b>2</b>       |
| 172–181                      | 1136.54              | 1136.53            | DNFLTAEAAK                                     | 7              |
| 172–195                      | 1621.80              | 1621.79            | DNFLTAEAAKEYGLIDEVMVPETK                       | 1              |
| 172–195                      | 2740.32              | 2740.32            | DNFLTAEAAKEYGLIDEVM(O)VPETK                    | 1              |
| 182–195                      | 1621.80              | 1621.79            | EYGLIDEVMVPETK                                 | 27             |
| 182–195                      | 1637.79              | 1637.79            | EYGLIDEVM(O)VPETK                              | 49             |

|                         |         |         |                                       |    |
|-------------------------|---------|---------|---------------------------------------|----|
| 182–195                 | 1653.79 | 1653.78 | EYGLIDEV <a href="#">MVPETK(OO)</a>   | 1  |
| <b>Untreated SaClpP</b> |         |         |                                       |    |
| 1–13                    | 1500.79 | 1500.80 | MNLIPTVIETTNR                         | 74 |
| 1–13                    | 1516.80 | 1516.79 | M(O)NLIPTVIETTNR                      | 16 |
| 1–16                    | 1842.97 | 1842.96 | MNLIPTVIETTNRGER                      | 17 |
| 1–16                    | 1858.96 | 1858.96 | M(O)NLIPTVIETTNRGER                   | 7  |
| 2–13                    | 1369.76 | 1369.76 | NLIPTVIETTNR                          | 10 |
| 2–16                    | 1711.92 | 1711.92 | NLIPTVIETTNRGER                       | 2  |
| 17–23                   | 886.42  | 886.42  | AYDIYSR                               | 6  |
| 113–145                 | 3480.83 | 3480.82 | FALPNAEVMIHQPLGGAQQGQATEIEIAANHILK    | 2  |
| 113–145                 | 3496.83 | 3496.81 | FALPNAEVM(O)IHQPLGGAQQGQATEIEIAANHILK | 1  |
| 158–164                 | 761.39  | 761.39  | TGQSIEK                               | 1  |
| 158–167                 | 1130.63 | 1130.63 | TGQSIEKIQK                            | 1  |
| 165–181                 | 1992.98 | 1992.98 | IQKDTDRDNFLTAEEAK                     | 8  |
| 168–181                 | 1623.74 | 1623.74 | DTDRDNFLTAEEAK                        | 48 |
| 168–195                 | 3227.53 | 3227.52 | DTDRDNFLTAEEAKEYGLIDEVMVPETK          | 3  |
| 172–181                 | 1136.54 | 1136.53 | DNFLTAEEAK                            | 6  |
| 182–195                 | 1621.80 | 1621.79 | EYGLIDEVMVPETK                        | 62 |
| 182–195                 | 1637.79 | 1637.79 | EYGLIDEVM(O)VPETK                     | 37 |

**Supplementary Figure 1.** SDS-PAGE of soluble proteins from *S. aureus* biofilms treated with LTGP or untreated.

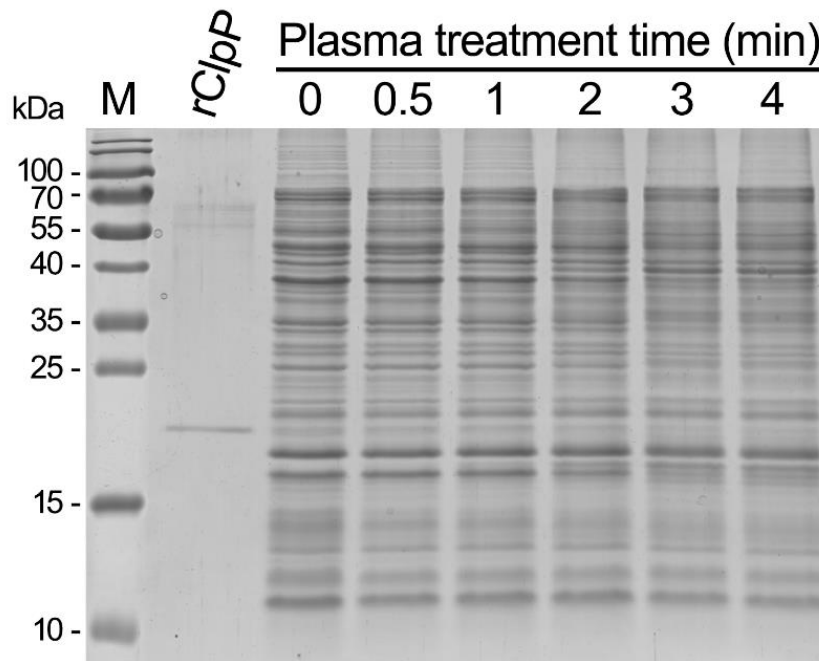

**Supplementary Figure 2.** The MS/MS spectrum of three oxidatively modified peptides derived from the tryptic digestion of LTGP-treated SaClpP protein.

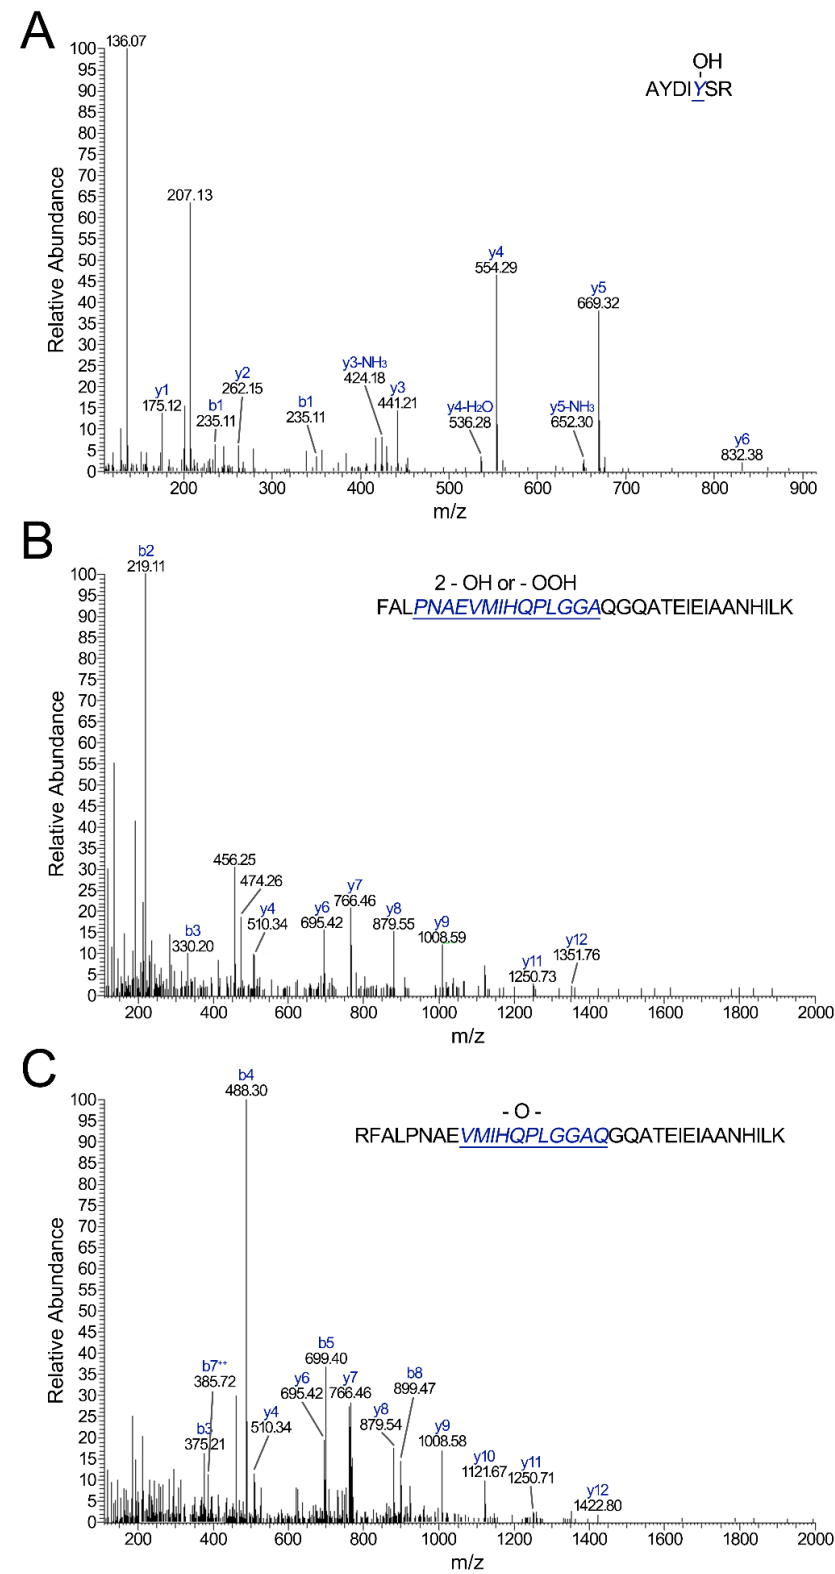

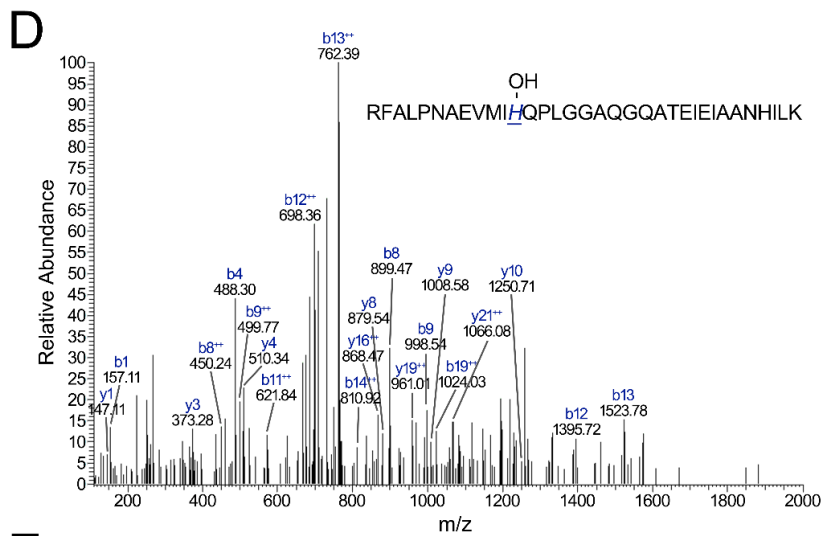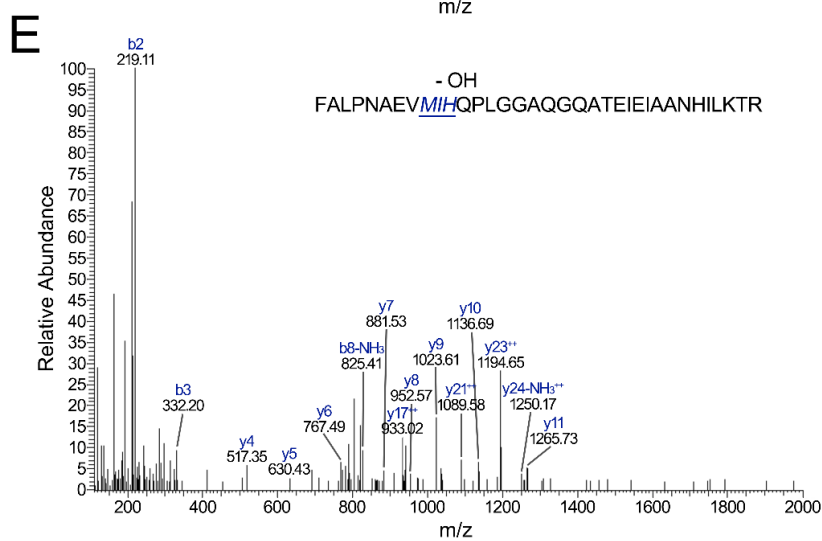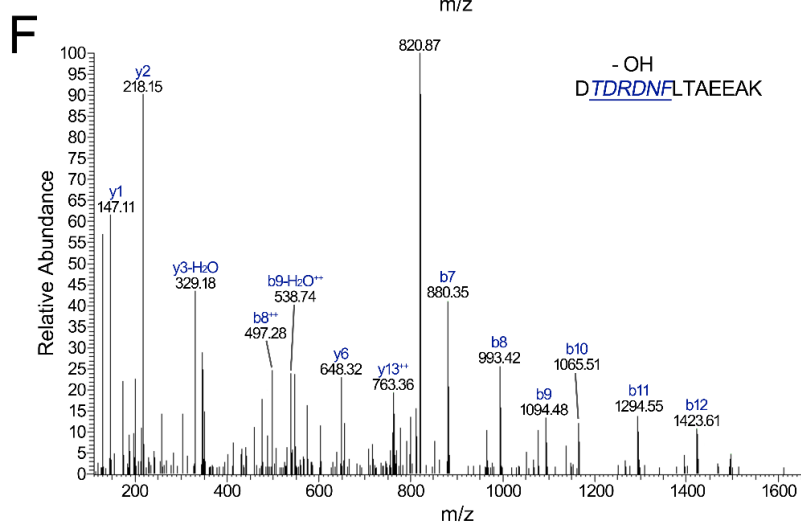

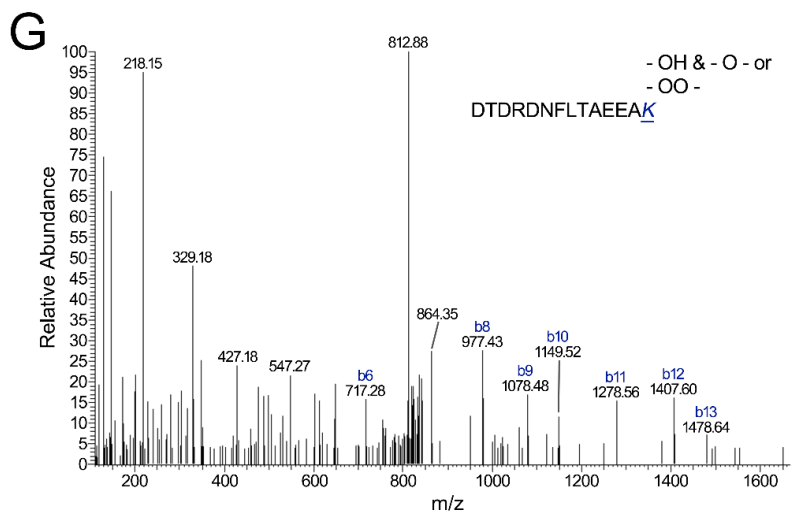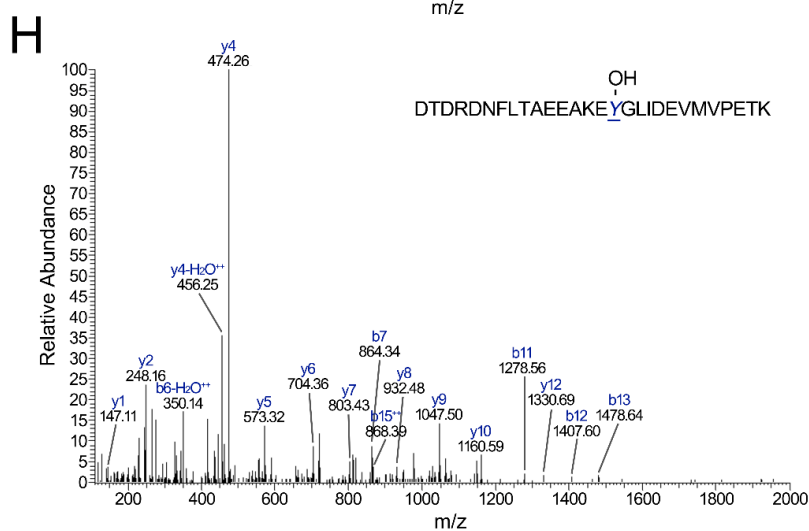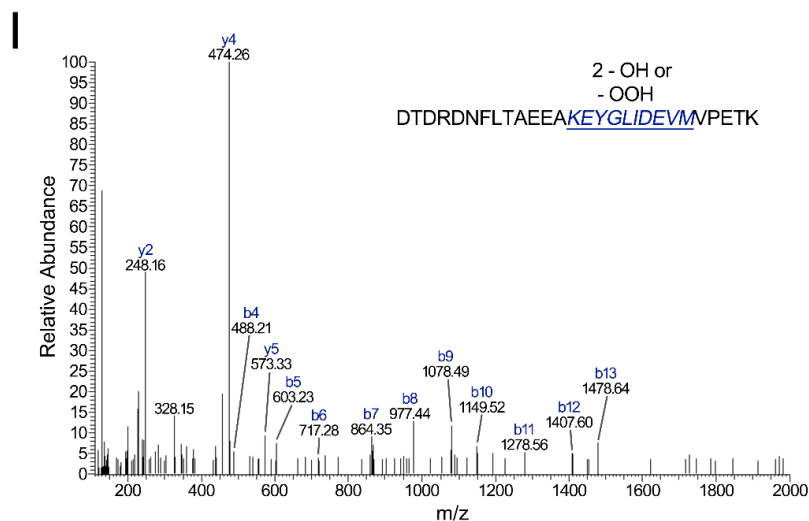

Supplement: s1 [file s1]
